# Supplementary material for: A Pore-Facing Glycan Determines GABAA Receptor Subunit Stoichiometry and Gating Behavior
Source: Research Square preprint supplement (doi:10.21203/rs.3.rs-7743743/v1), 2025-10-17
Supplement: Supplementary file 1 [file 038fbd46519e39c964676776.docx]

Supplementary Materials for

**A Pore-Facing Glycan Determines GABA**A**​ Receptor Subunit Stoichiometry and Gating Behavior**

Amin Akbari Ahangar1, and Jing Li*1

1Department of Biomolecular Sciences, School of Pharmacy, University of Mississippi, University, Mississippi, 38677, United States

* Corresponding author. Email: jli15@olemiss.edu

This file includes:

Supplementary Figure 1 to 6

Supplementary Tables 1 to 4


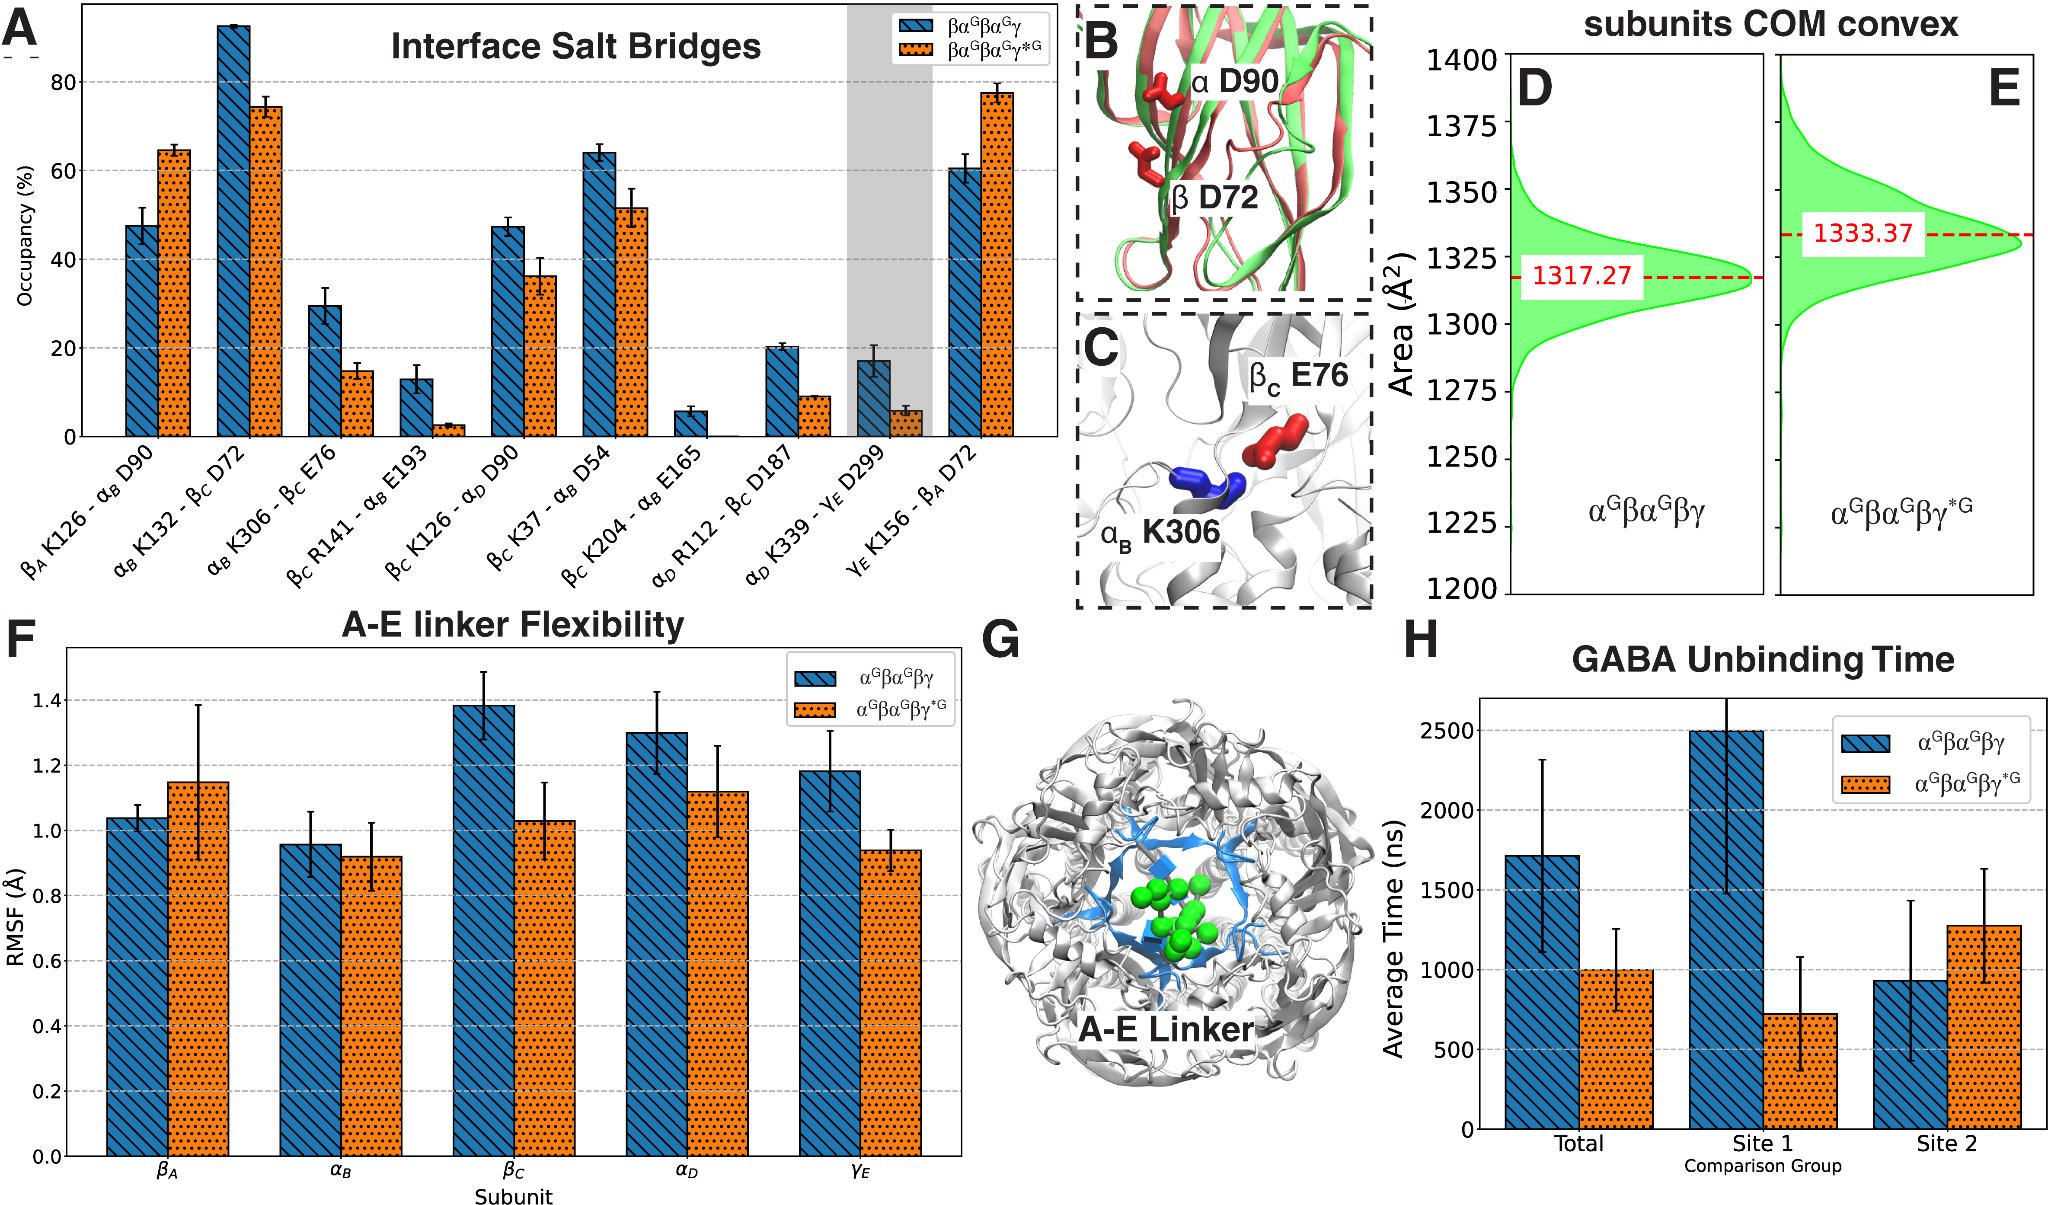
Supplementary Figure 1: Effect of additional glycan on salt bridges and internal loops. A) affected salt bridges in βαGβαGγ*G including TMD. B)Structural proximity of two aspartic acid residues that are involved in salt bridges at the interface. C) Disrupted salt bridge at the interface of TMD-ECD implicated in the activity pathway. D) Convex in area of βαGβαGγ and E) βαGβαGγ*G ECD. F) RMSF of A-E linker in each subunit. G) location of A-E linker, which hosts the glycosylation site on the α subunit, H) Time to GABA unbinding.


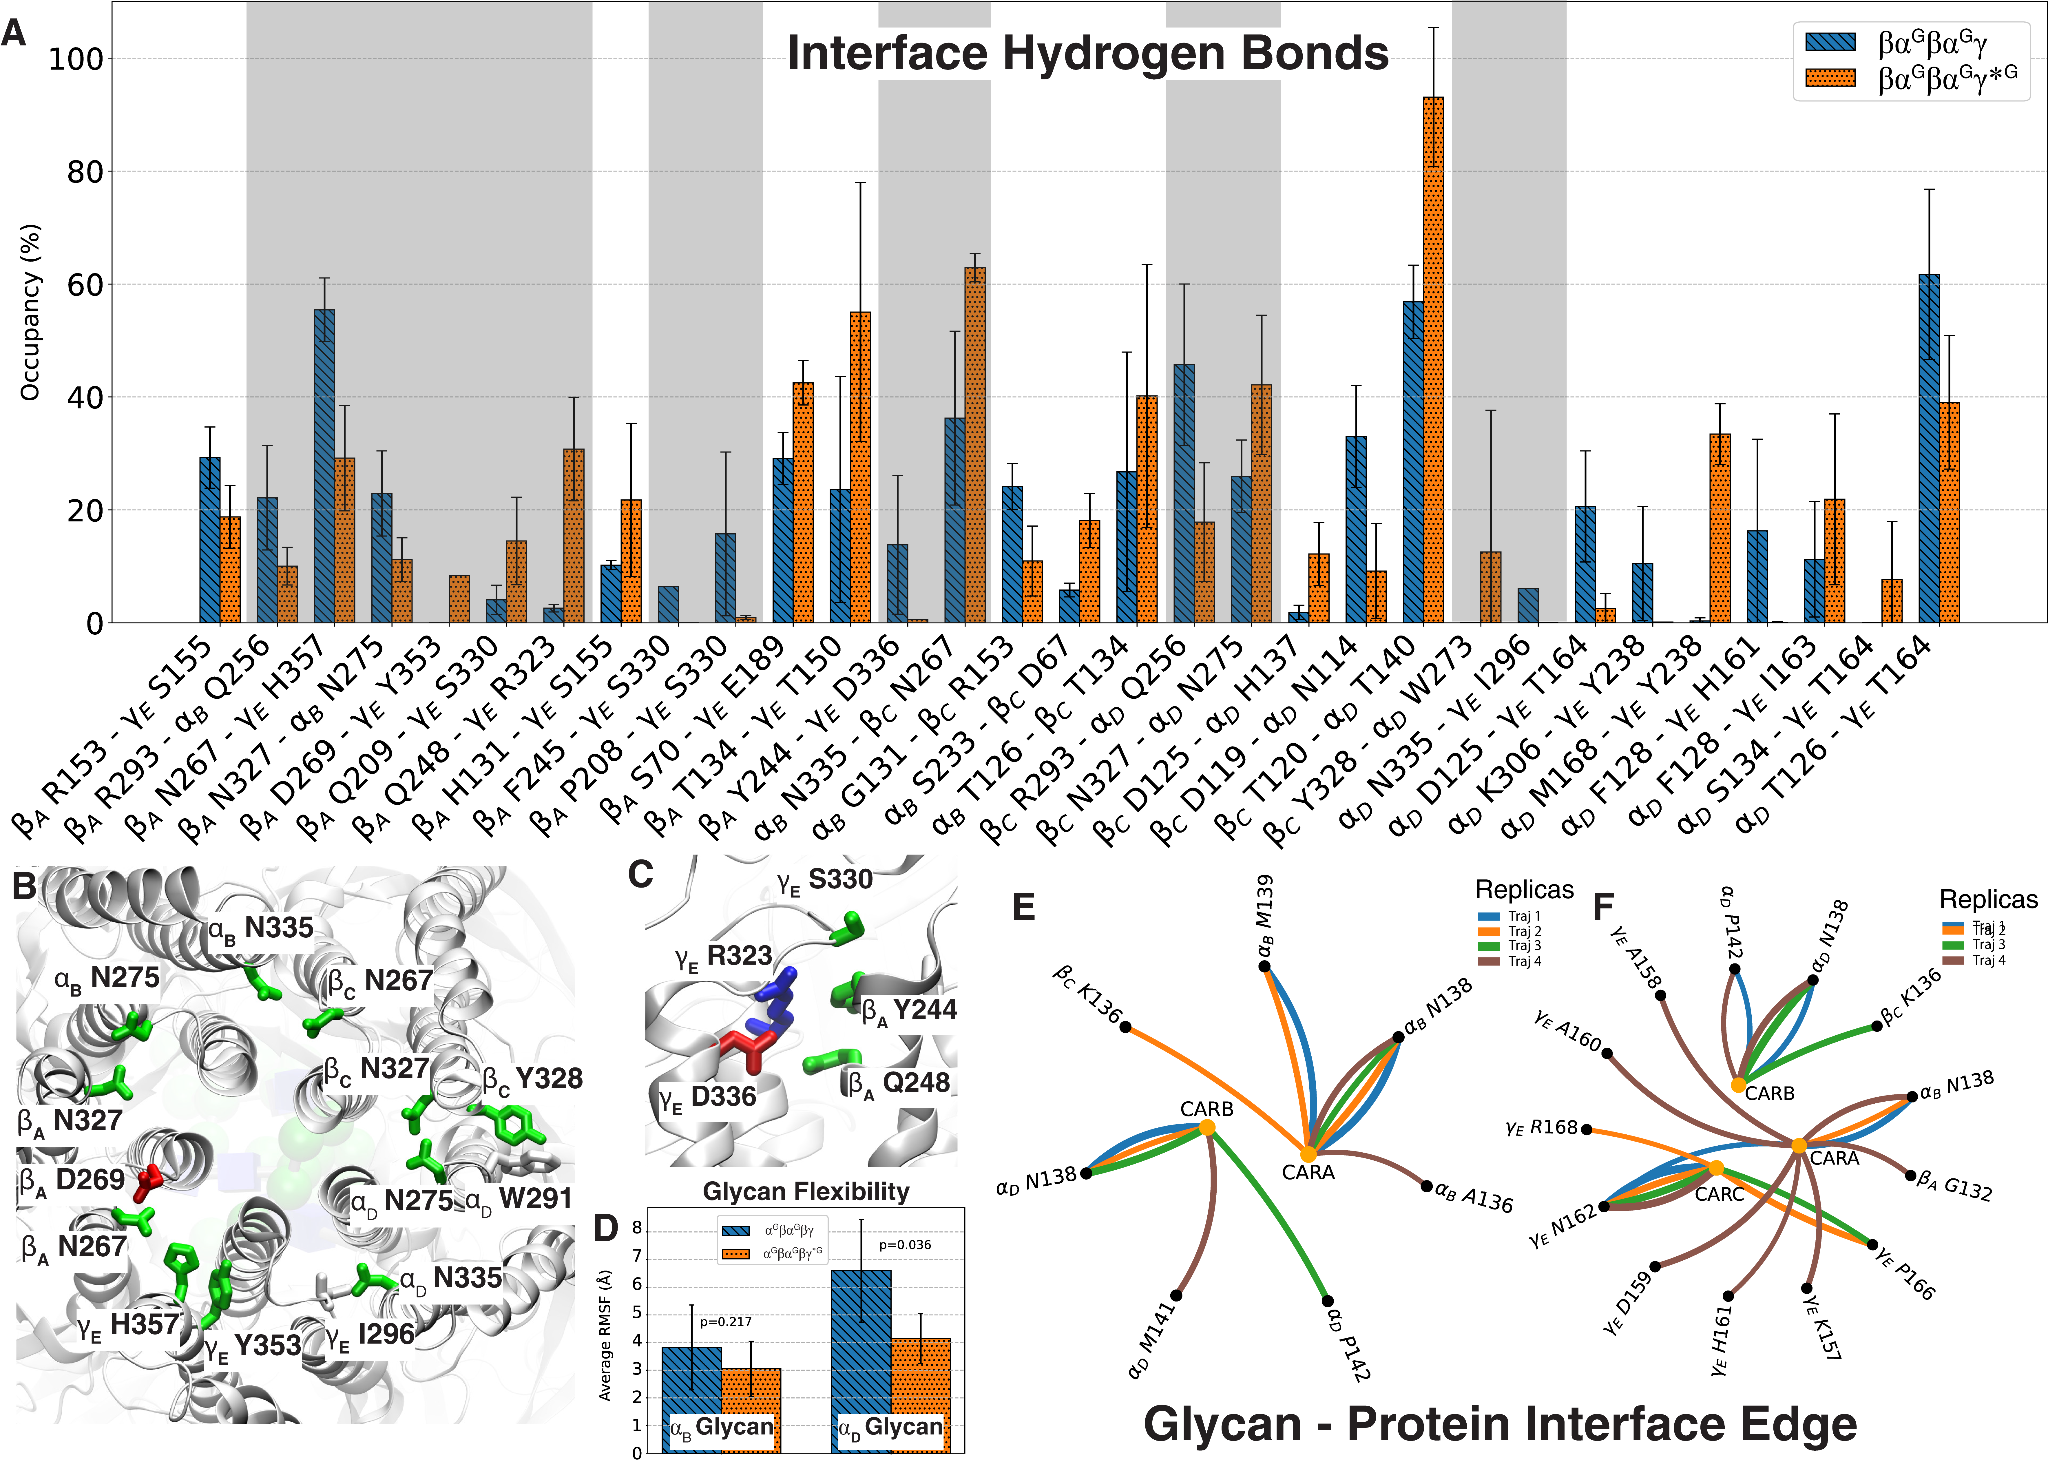


Supplementary Figure 2: Effect of additional glycan on hydrogen bond networks and the pore. A) affected hydrogen bonds in βαGβαGγ*G at ECD and TMD (gray). The αD-γE ECD harbours the benzodiazepines binding site, while the αB-βC interface is where the cholesterol binding site is located. B) Disrupted hydrogen bonds at the lower parts of TMD. C) Disrupted hydrogen bonds at the interface of benzodiazepine binding site. D) Average RMSF of glycans attached to α subunits in βαGβαGγ and βαGβαGγ*G system, E) Glycan-protein interface edge in βαGβαGγ and in F) βαGβαGγ*G.


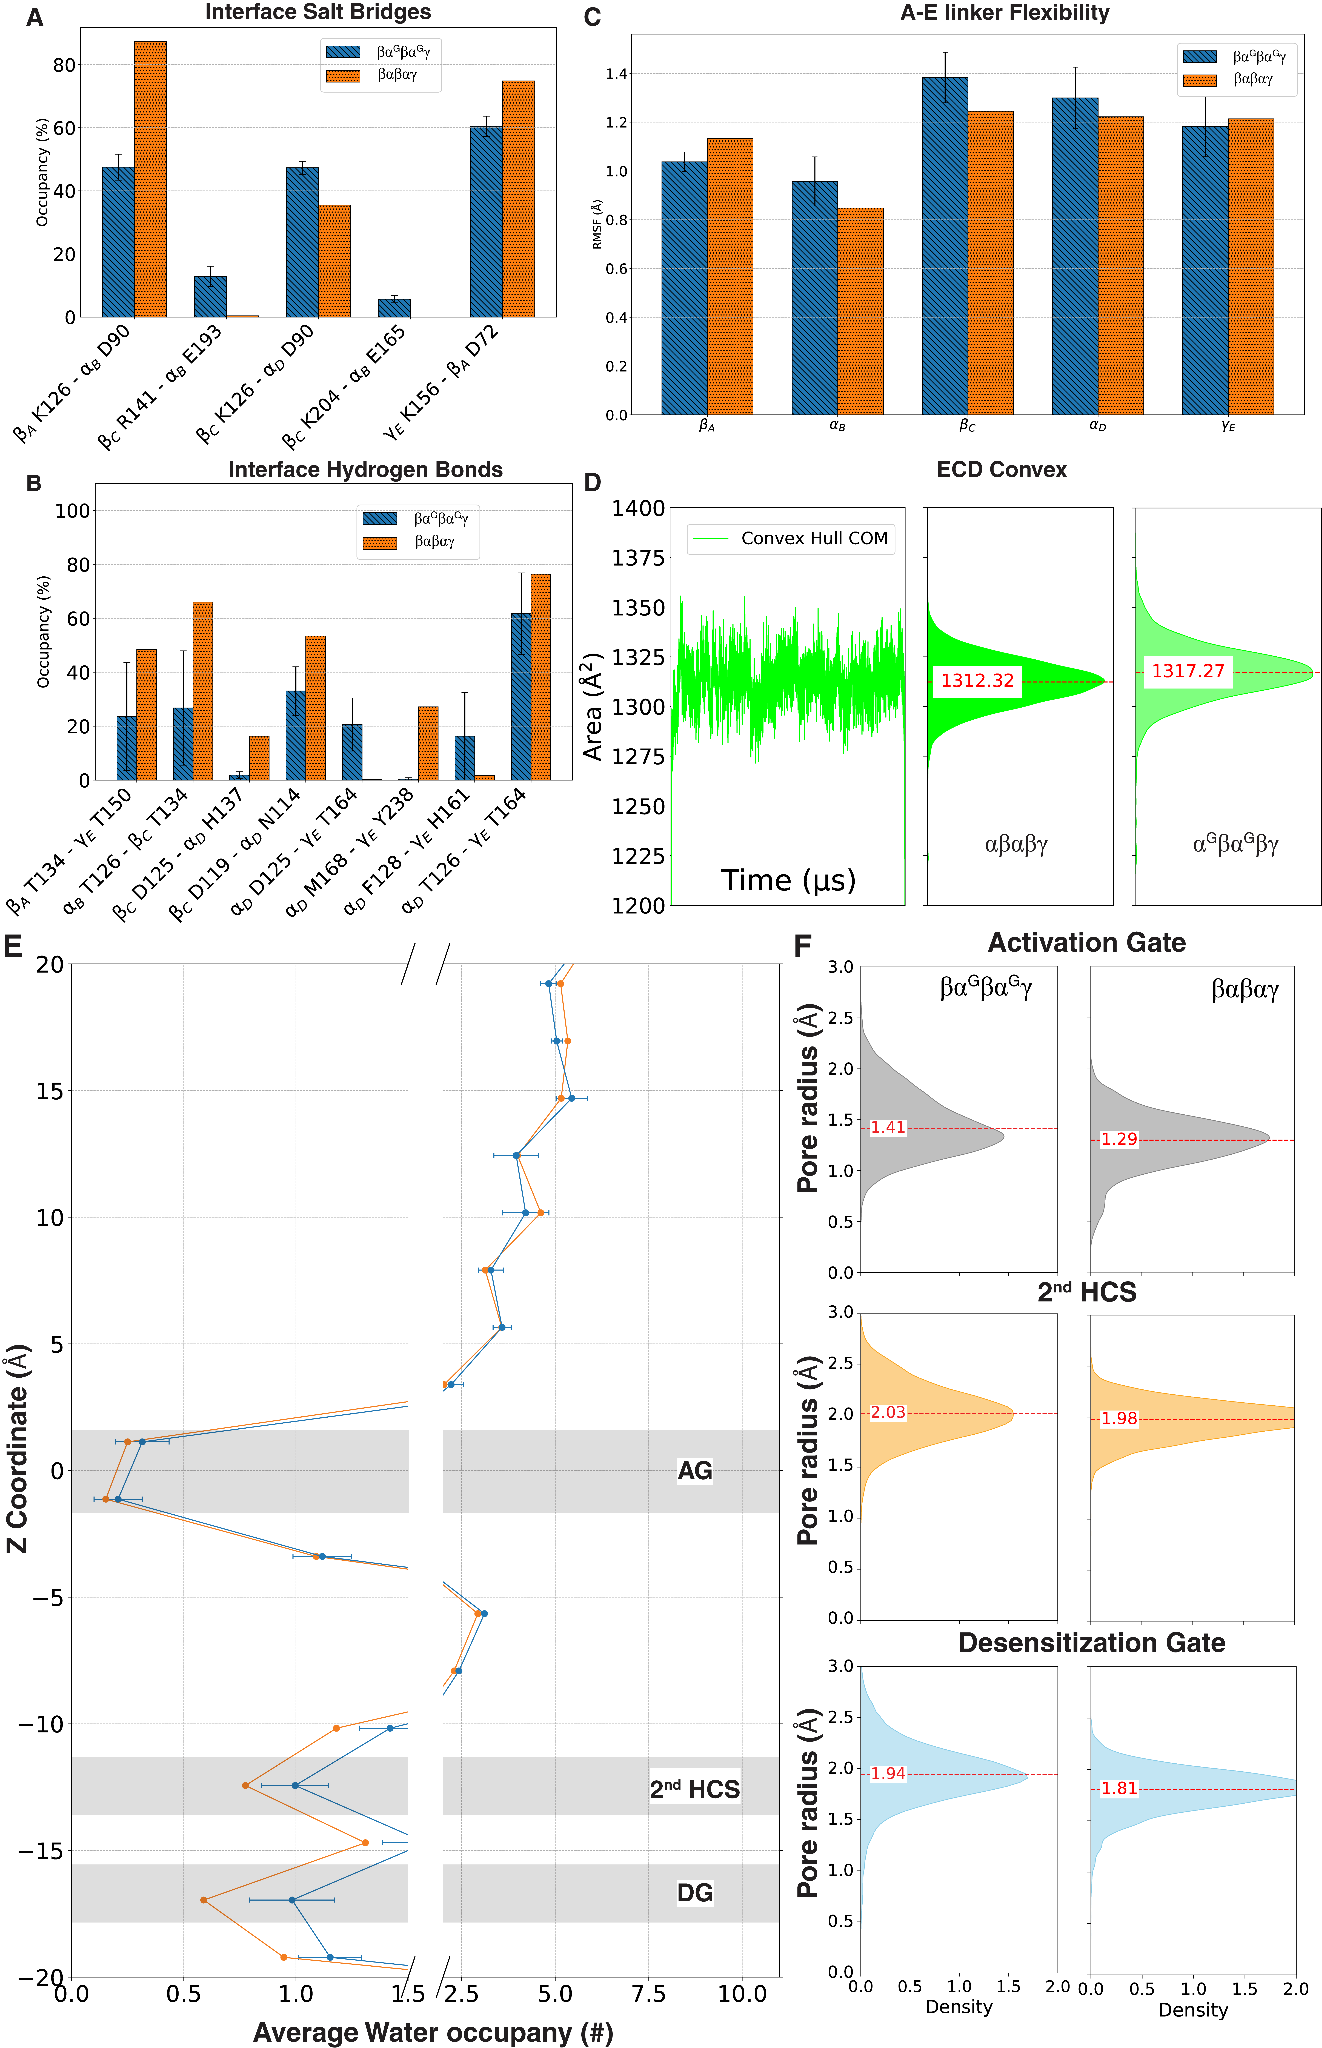


Supplementary Figure 3: Effect of removing all the pore-facing glycans on the βαβαγ dynamics. A) Change in previously detected salt bridge occupancies at the βαβαγ interface, B) hydrogen bond occupancy change at the interface. C) RMSF of A-E linker across the subunits in βαβαγ. D) ECD convex of βαβαγ traced and averaged along the length of the trajectory. E) Water occupancy at βαβαγ TMD compared with βαGβαGγ. F) pore radius at AG, 2nd HCS, and DG.


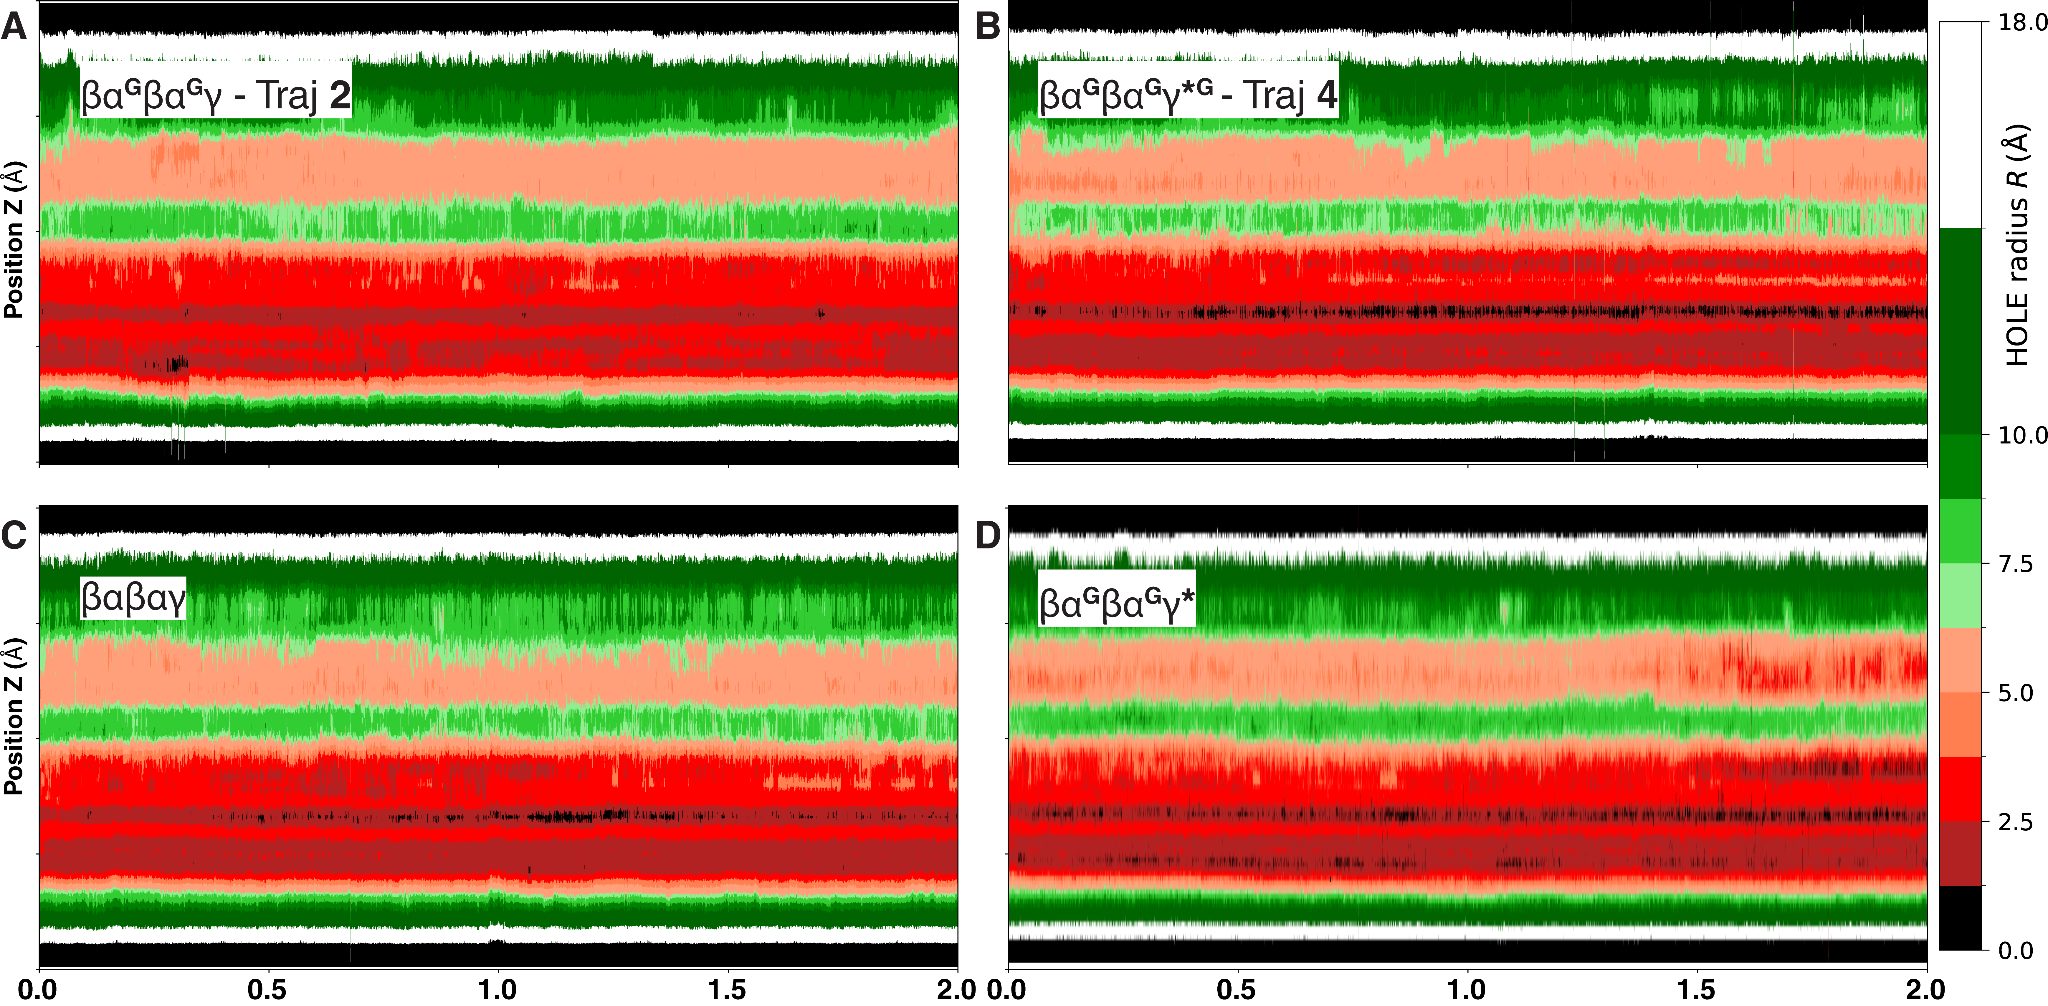


Supplementary Figure 4: Pore-radius plot showing the evolution of the pore radius along the Z axis along the trajectory time in A) βαGβαGγ B) βαGβαGγ*G C) βαβαγ and D) βαGβαGγ*.


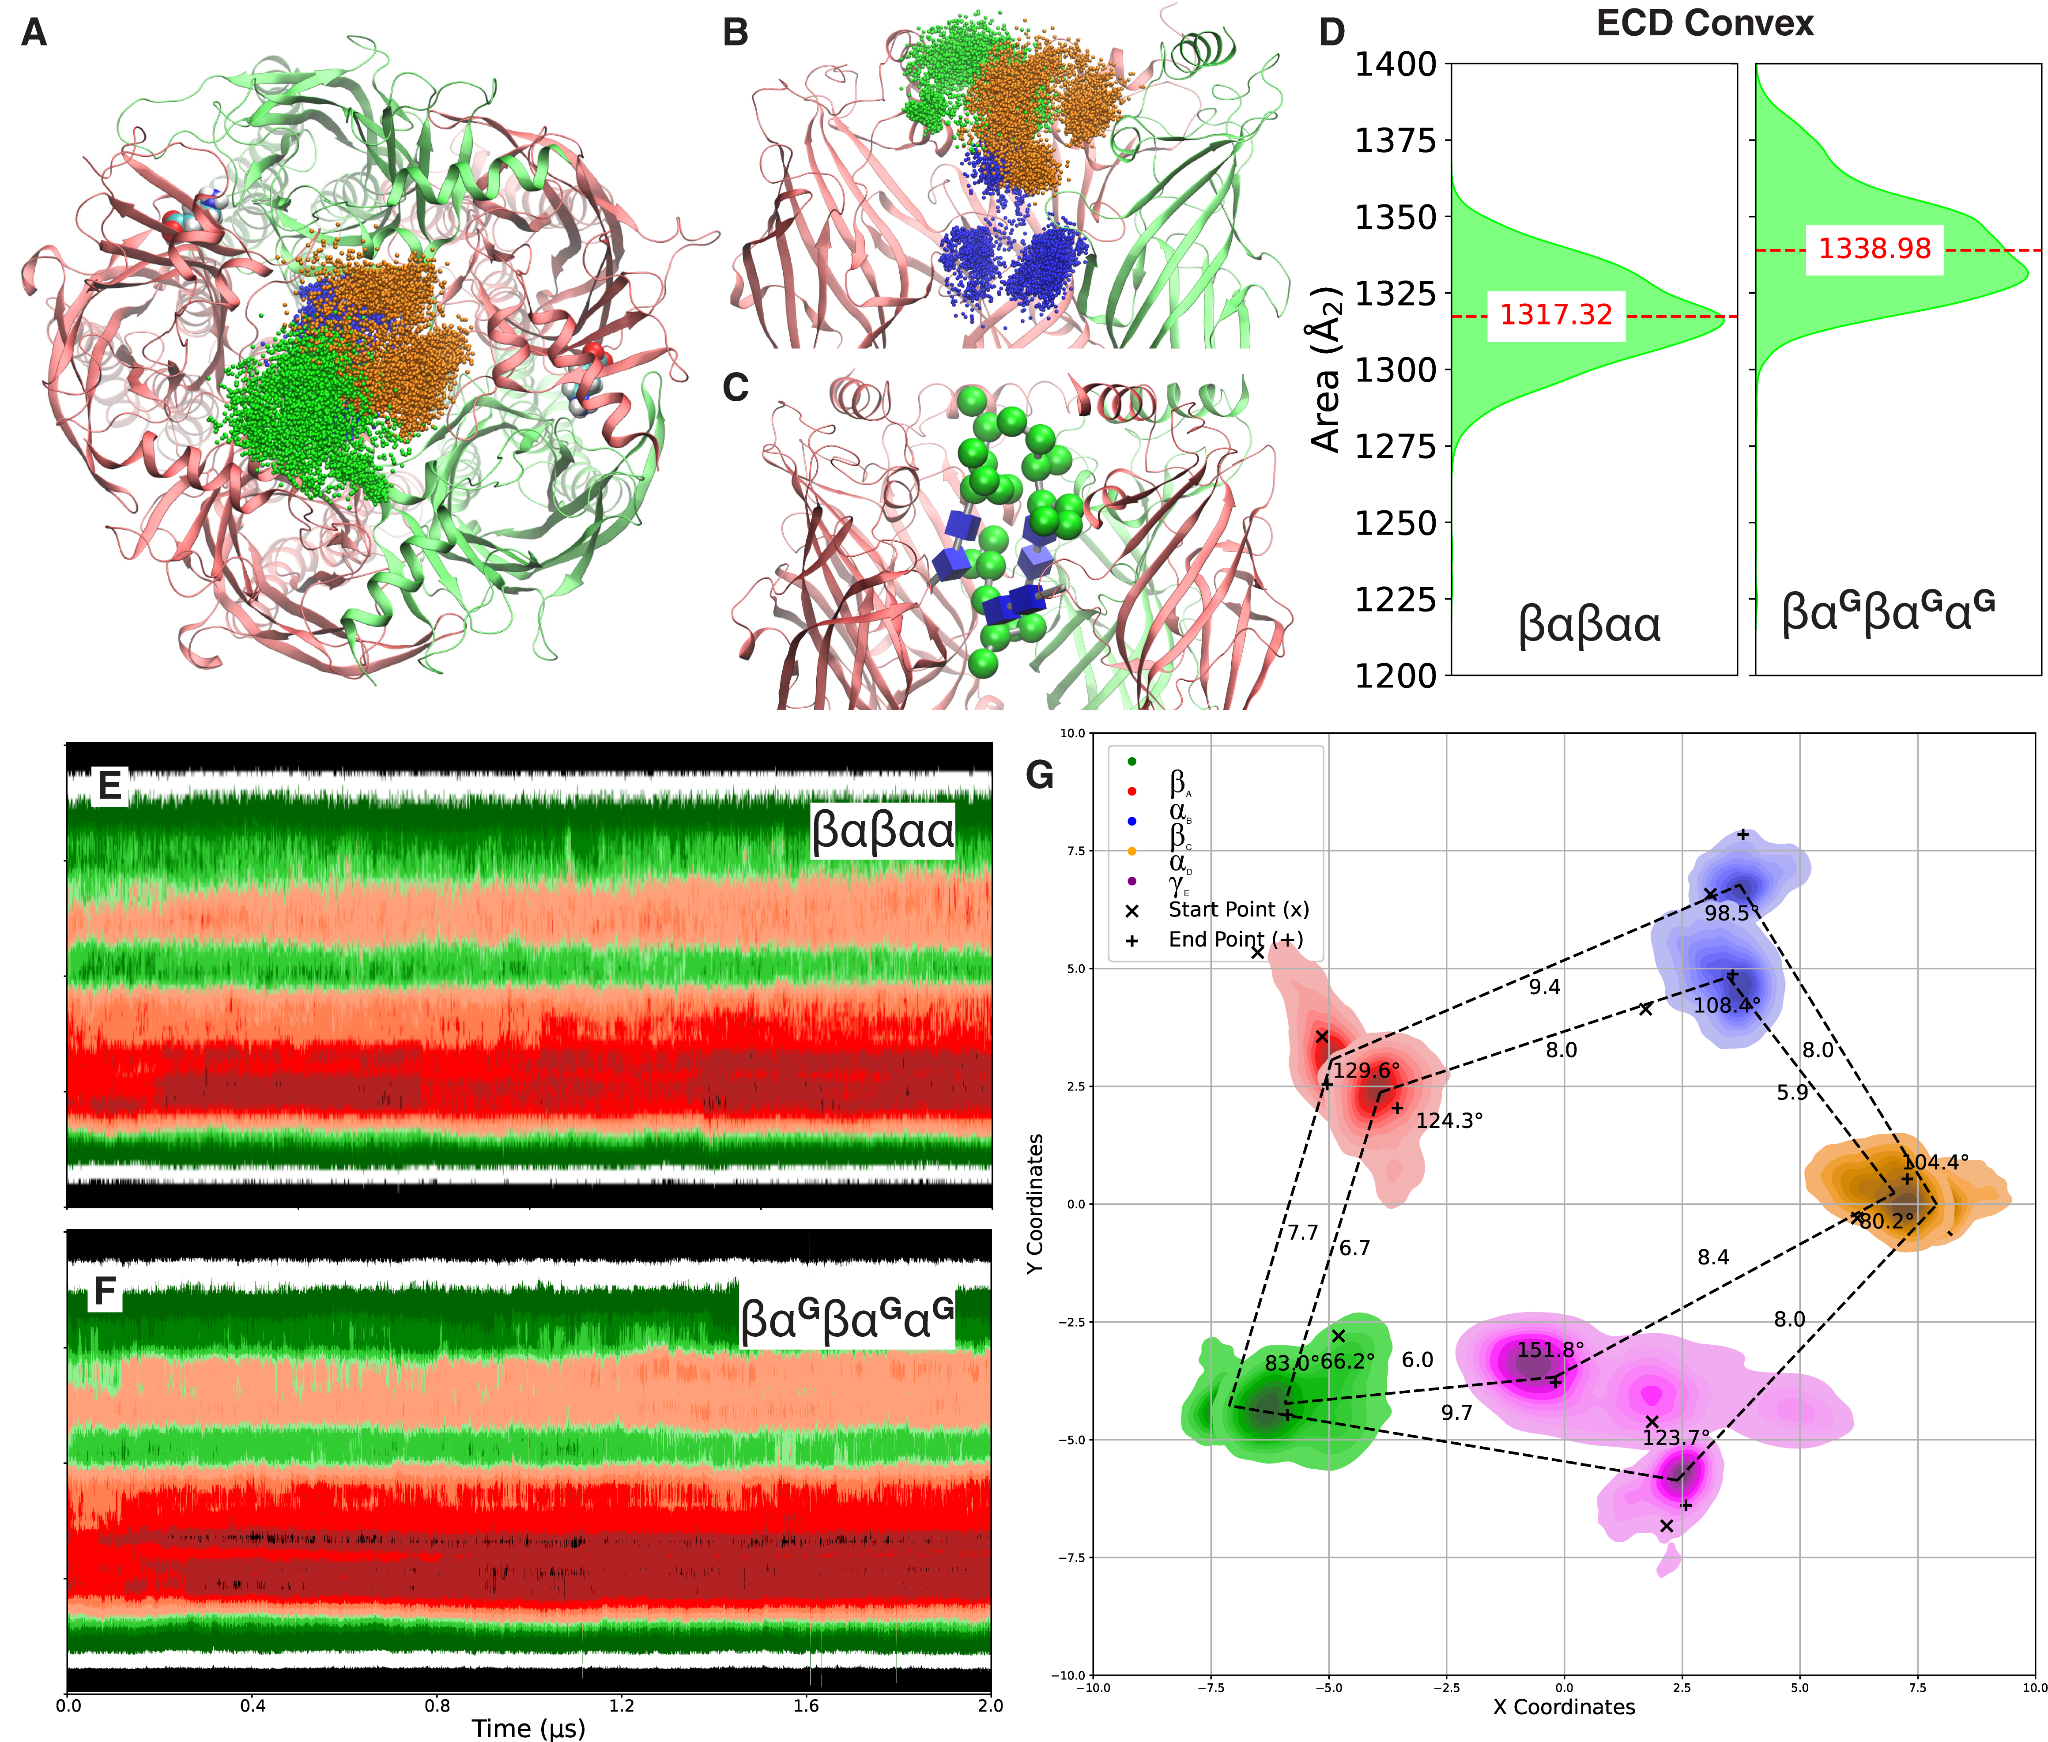
Supplementary Figure 5: The effect of third αG on channel dynamics in βαGβαGαG. A) Top view of glycan localization. B) Side view of glycan localization, C) The glycan on αB is placed in between the glycans attached to αD and αE. D) ECD convex in βαGβαGαG compared with βαβαα E) Pore-radius plot of the pore radius tracked along the Z axis for the duration of the simulation for βαβαα and F) βαGβαGαG G) Location of TMDs for each subunits. The inner line connects the median position of the DG while the outer line is at the median location of AG.


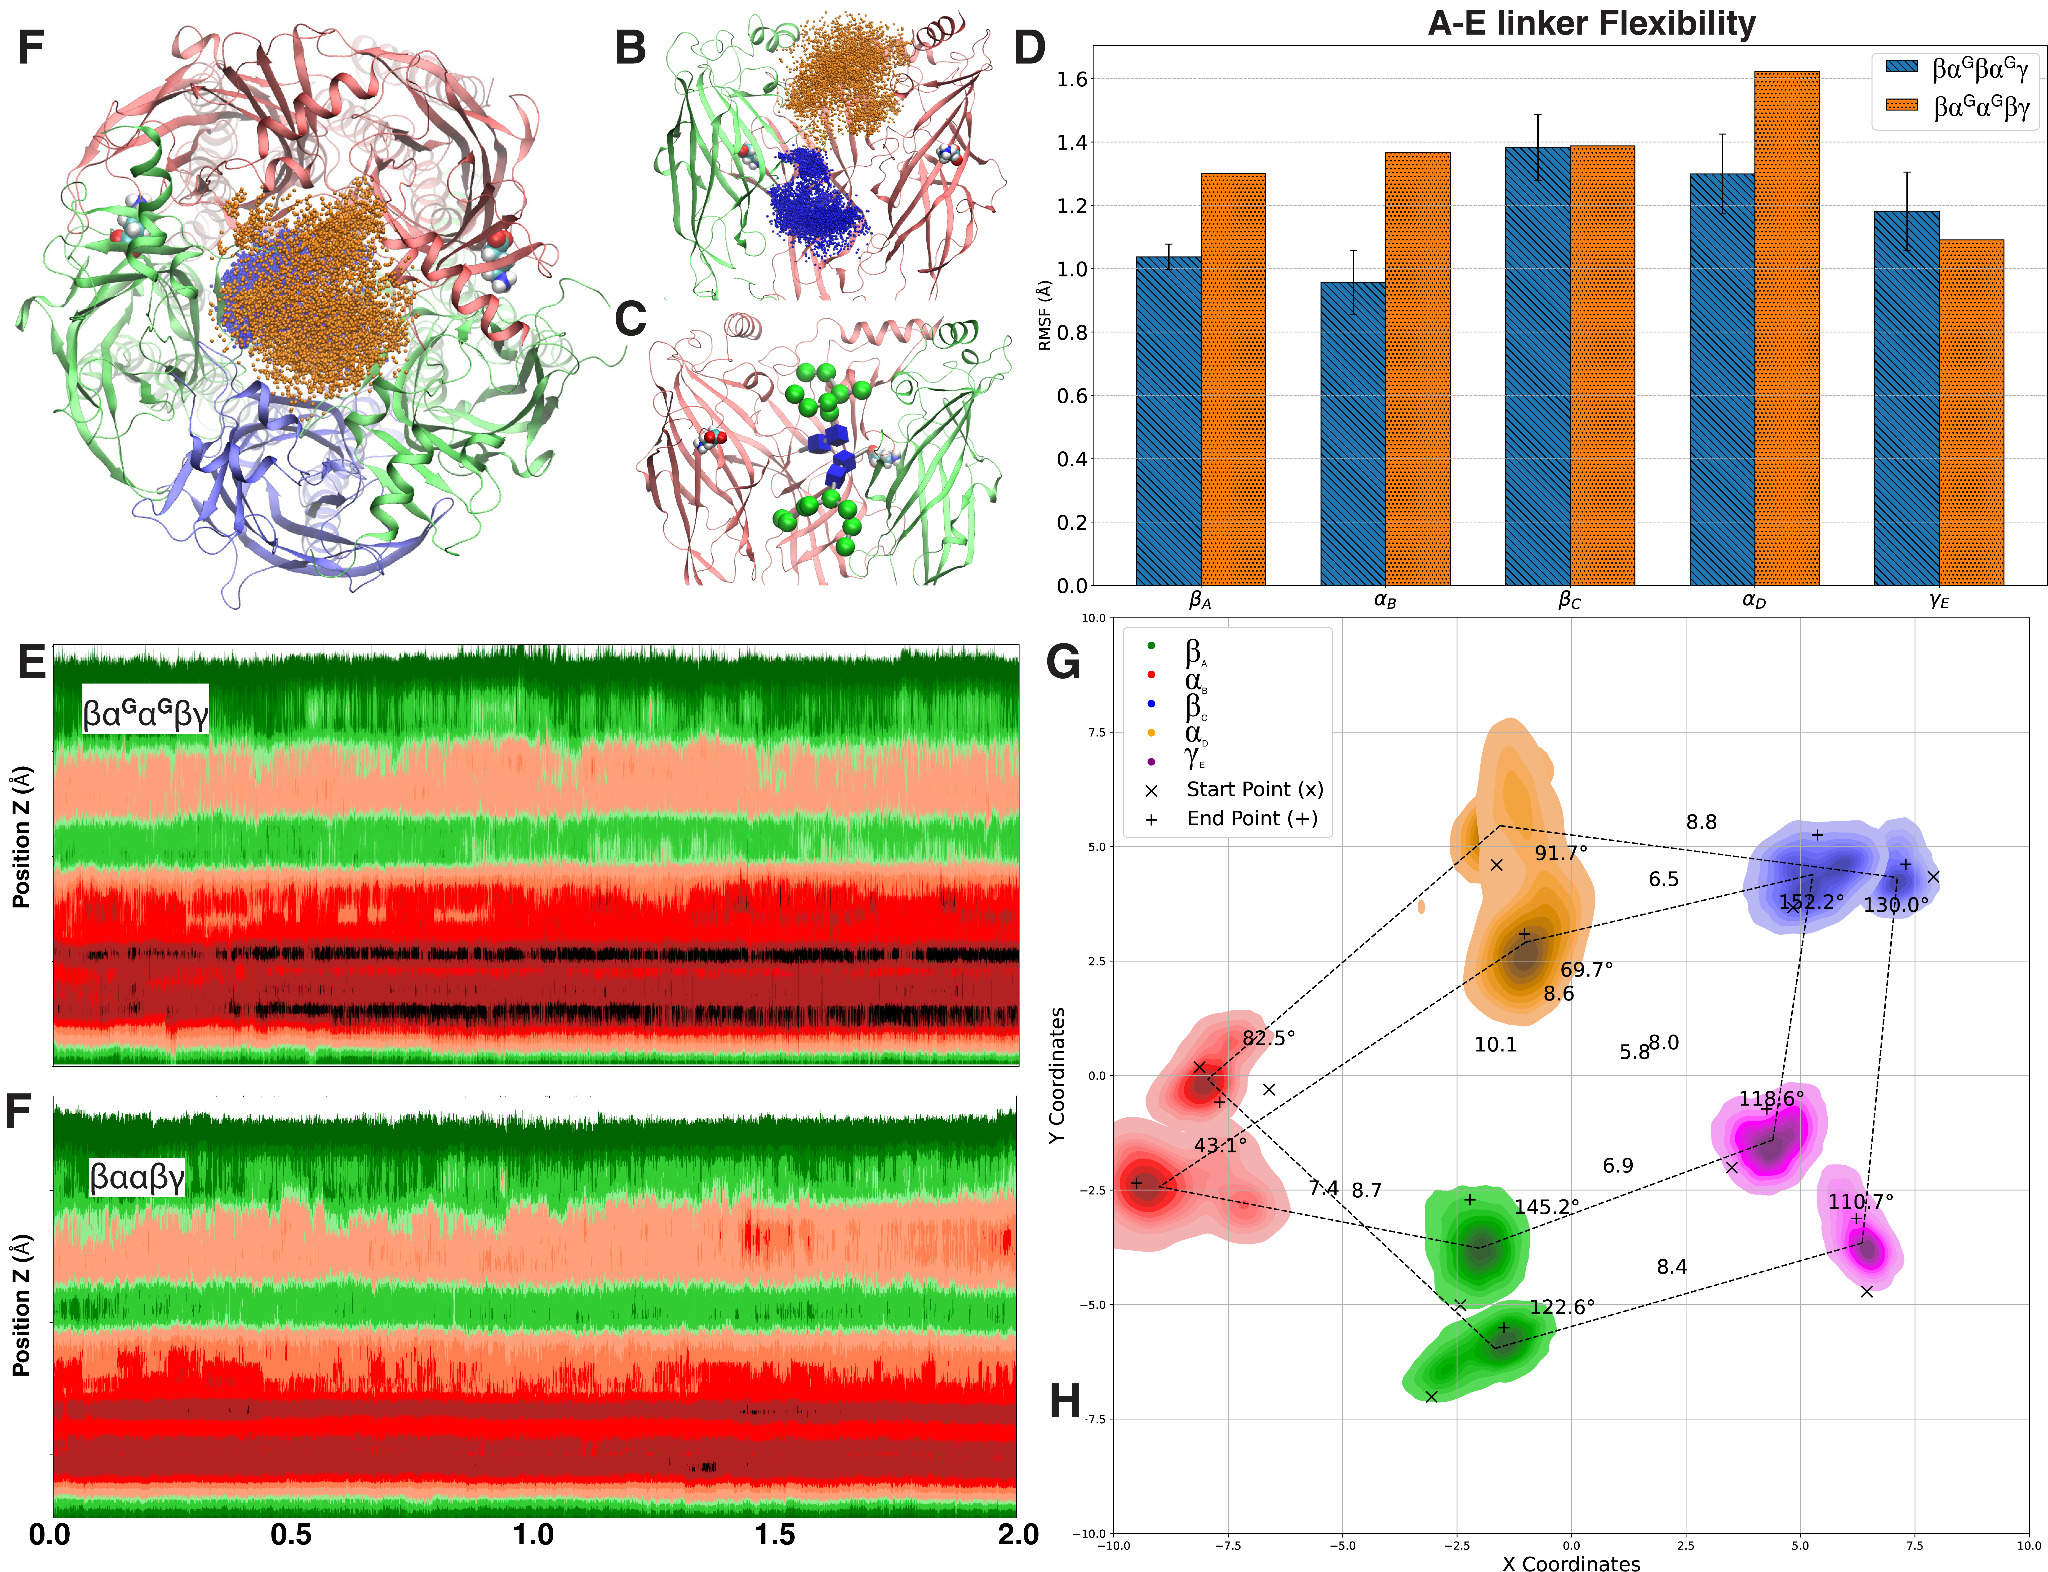


Supplementary Figure 6: Effect of glycosylation on adjacent α subunits in βαGαGβγ. A) Top and side B) view of glycan localization. C) The adjacency of glycans can cause them to clash at the glycan core. D) RMSF of A-E linker across the subunits in βαGαGβγ. E) Watermelon plot of the pore radius tracked along the Z axis for the duration of the simulation for βαGαGβγ and F) βααβγ. G) Location of TMDs across subunits. The inner line connects the median position of the DG while the outer line is at the median location of AG.

|  | βαGβαGγ*G-1 | βαGβαGγ*G-2 | βαGβαGγ*G-3 | βαGβαGγ*G-4 |  | βαGβαGγ-1 | βαGβαGγ-2 | βαGβαGγ-3 | βαGβαGγ-4 |  | βαGβαGαG | βαGαGβγ | βαβαγ |
| --- | --- | --- | --- | --- | --- | --- | --- | --- | --- | --- | --- | --- | --- |
| βA RMSF | 0.61 | 2.52 | 0.64 | 1.29 |  | 1.22 | 1.35 | 1.27 | 0.65 |  | 1.25 | 1.3 | 1.33 |
| αB RMSF | 0.71 | 1.44 | 0.65 | 1.64 |  | 0.66 | 1.49 | 1.69 | 0.71 |  | 1.38 | 1.36 | 0.85 |
| βC RMSF | 1.72 | 0.7 | 0.76 | 1.44 |  | 1.9 | 1.61 | 2.03 | 0.92 |  | 1.11 | 1.39 | 1.24 |
| αD RMSF | 0.87 | 0.84 | 1.18 | 1.32 |  | 1.28 | 1.56 | 1.31 | 0.98 |  | 1.09 | 1.62 | 1.22 |
| γ RMSF | 1.7 | 1.52 | 0.63 | 0.91 |  | 0.95 | 1.35 | 1.41 | 1.62 |  | 1.43 | 1.09 | 1.21 |
|  |  |  |  |  |  |  |  |  |  |  |  |  |  |
| AG Radius | 1.4 | 1.72 | 1.23 | 1.35 |  | 1.14 | 1.15 | 1.13 | 1.08 |  | 1.37 | 0.88 | 1.29 |
| HCS Radius | 1.99 | 2.27 | 1.98 | 1.9 |  | 1.97 | 1.9 | 1.75 | 1.79 |  | 1.48 | 1.63 | 1.98 |
| DG Radius | 1.97 | 2.34 | 1.95 | 1.75 |  | 2.05 | 1.98 | 1.95 | 2.16 |  | 1.74 | 0.84 | 1.81 |
|  |  |  |  |  |  |  |  |  |  |  |  |  |  |
| Site 1 (ns) | 750 | 40 | 400 | 1700 |  | 5500 | 1400 | 1980 | 1100 |  | 390 | 190 | 660 |
| Site 2 (ns) | 1500 | -- | 300 | 1300 |  | 2360 | 520 | 800 | 40 |  | 1700 | -- | -- |
|  | rebind | rebind | rebind | -- |  |  |  |  |  |  |  |  |  |
|  |  |  |  |  |  |  |  |  |  |  |  |  |  |
|  | βαGβαGγ*G-1 | βαGβαGγ*G-2 | βαGβαGγ*G-3 | βαGβαGγ*G-4 |  | βαGβαGγ-1 | βαGβαGγ-2 | βαGβαGγ-3 | βαGβαGγ-4 |  | βαGβαGαG | βαGαGβγ | βαβαγ |
| CARA RMSF | 2.3958 | 2.0174 | 3.8479 | 3.9514 |  | 6.0358 | 2.8892 | 2.696 | 3.6844 |  | 2.8114 | 4.7454 | -- |
| CARB RMSF | 2.9106 | 4.1043 | 4.6154 | 4.9678 |  | 7.752 | 5.5739 | 8.5215 | 4.5384 |  | 4.9534 | 9.9381 | -- |
| CARC RMSF | 4.7212 | 5.9418 | 7.3748 | 7.2233 |  | -- | -- | -- | -- |  | 4.0318 | -- | -- |

Supplementary Table 1: Internal loops RMSF, Pore radius, dissociation time and glycans RMSF data

| edge | replica_1 | replica_2 | replica_3 | replica_4 |
| --- | --- | --- | --- | --- |
| β_{A} G132 - CARA AMAN 7 |  |  |  | 0.5518 |
| β_{A} H131 - CARA AMAN 7 |  |  |  | 0.4726 |
| β_{A} F129 - CARA AMAN 7 |  |  |  | 0.4796 |
| β_{A} F129 - CARA BGLCNA 1 |  |  |  | 0.4644 |
| β_{A} S128 - CARA BGLCNA 1 |  |  |  | 0.4852 |
| β_{A} T134 - CARC BGLCNA 1 | 0.3141 |  | 0.452 |  |
| β_{A} T134 - CARC BGLCNA 2 | 0.2048 |  | 0.1832 |  |
| β_{A} V133 - CARA AMAN 7 |  |  |  | 0.4953 |
| β_{A} V135 - CARC BGLCNA 2 |  | 0.2351 | 0.284 |  |
| α_{B} A136 - CARA BGLCNA 1 |  |  |  | 0.4621 |
| α_{B} R56 - CARB AMAN 5 |  |  |  | 0.3726 |
| α_{B} R56 - CARB AMAN 6 |  |  |  | 0.4568 |
| α_{B} N138 - CARA BGLCNA 1 | 0.7013 | 0.568 | 0.4543 | 0.6101 |
| α_{B} N55 - CARB AMAN 5 |  |  |  | 0.3923 |
| α_{B} N55 - CARB AMAN 6 |  |  |  | 0.4721 |
| α_{B} D54 - CARB AMAN 6 |  |  |  | 0.4547 |
| α_{B} K120 - CARB AMAN 6 |  |  |  | 0.3783 |
| α_{B} Y53 - CARB AMAN 6 |  |  |  | 0.4056 |
| α_{B} V135 - CARA BGLCNA 1 |  |  |  | 0.3443 |
| β_{C} R110 - CARB AMAN 5 |  |  |  | 0.3832 |
| β_{C} D113 - CARB BGLCNA 2 |  | 0.1671 | 0.329 | 0.3907 |
| β_{C} D113 - CARB BMAN 3 |  |  |  | 0.3933 |
| β_{C} Q114 - CARB AMAN 4 |  |  | 0.4132 |  |
| β_{C} Q114 - CARB AMAN 5 |  |  |  | 0.3799 |
| β_{C} Q114 - CARB AMAN 6 |  |  | 0.2705 |  |
| β_{C} Q114 - CARB AMAN 9 |  |  |  | 0.3728 |
| β_{C} Q114 - CARB BMAN 3 |  | 0.1641 | 0.4255 | 0.4024 |
| β_{C} I49 - CARB AMAN 8 |  |  |  | 0.2558 |
| β_{C} I49 - CARB AMAN 9 |  | 0.3706 |  | 0.2866 |
| β_{C} K127 - CARA AMAN 5 | 0.312 | 0.0427 |  |  |
| β_{C} K136 - CARB BGLCNA 1 |  |  | 0.6946 |  |
| β_{C} F129 - CARA AMAN 5 |  | 0.1091 |  |  |
| β_{C} F129 - CARA AMAN 6 | 0.2808 |  | 0.1414 |  |
| β_{C} S128 - CARA AMAN 5 | 0.3614 |  |  |  |
| β_{C} T134 - CARA BGLCNA 1 |  |  |  | 0.2399 |
| β_{C} Y47 - CARB AMAN 9 |  |  |  | 0.3547 |
| β_{C} V130 - CARA AMAN 6 | 0.3017 |  |  |  |
| β_{C} V133 - CARA BGLCNA 1 |  |  |  | 0.2604 |
| α_{D} R163 - CARA AMAN 6 |  |  |  | 0.243 |
| α_{D} N138 - CARA AMAN 5 | 0.4834 |  |  |  |
| α_{D} N138 - CARA AMAN 6 | 0.3147 |  |  |  |
| α_{D} N138 - CARB BGLCNA 1 | 0.5956 | 0.3243 | 0.8255 | 0.706 |
| α_{D} L116 - CARB AMAN 8 | 0.1952 |  |  | 0.1643 |
| α_{D} L116 - CARB AMAN 9 | 0.056 |  |  |  |
| α_{D} K133 - CARA AMAN 5 |  |  |  | 0.4508 |
| α_{D} K133 - CARA AMAN 6 |  |  |  | 0.4677 |
| α_{D} K144 - CARA AMAN 10 |  | 0.136 | 0.1155 |  |
| α_{D} M141 - CARB BGLCNA 1 |  |  |  | 0.4261 |
| α_{D} P142 - CARB BGLCNA 1 | 0.5348 |  |  | 0.5285 |
| α_{D} T140 - CARB BGLCNA 1 |  | 0.0565 |  |  |
| α_{D} T161 - CARA AMAN 6 |  |  |  | 0.2983 |
| α_{D} V135 - CARA AMAN 5 | 0.264 |  |  |  |
| α_{D} V135 - CARA AMAN 6 |  |  |  | 0.3957 |
| γ_{E} A158 - CARA AMAN 4 |  |  |  | 0.5846 |
| γ_{E} A158 - CARA AMAN 7 |  |  | 0.384 | 0.5802 |
| γ_{E} A160 - CARA AMAN 4 |  |  |  | 0.6038 |
| γ_{E} A160 - CARA AMAN 7 |  |  |  | 0.5944 |
| γ_{E} A160 - CARA BMAN 3 |  |  |  | 0.5851 |
| γ_{E} R168 - CARC BGLCNA 1 | 0.2787 | 0.5043 | 0.444 | 0.3756 |
| γ_{E} N140 - CARC BGLCNA 2 |  |  |  | 0.2888 |
| γ_{E} N162 - CARA AMAN 8 | 0.5478 |  |  |  |
| γ_{E} N162 - CARA AMAN 9 | 0.386 | 0.0837 | 0.2528 | 0.3917 |
| γ_{E} N162 - CARA BMAN 3 | 0.4978 |  |  |  |
| γ_{E} N162 - CARC BGLCNA 1 | 0.8263 | 0.7115 | 0.7695 | 0.7733 |
| γ_{E} N79 - CARC AMAN 9 |  |  |  | 0.432 |
| γ_{E} D159 - CARA AMAN 4 |  |  |  | 0.6413 |
| γ_{E} H161 - CARA AMAN 4 |  |  |  | 0.5122 |
| γ_{E} H161 - CARA AMAN 5 |  |  |  | 0.377 |
| γ_{E} I163 - CARA BMAN 3 | 0.4101 |  |  |  |
| γ_{E} I163 - CARB BGLCNA 1 | 0.0762 |  |  |  |
| γ_{E} K144 - CARC AMAN 9 |  |  |  | 0.3631 |
| γ_{E} K144 - CARC BMAN 3 |  |  |  | 0.4903 |
| γ_{E} K157 - CARA AMAN 7 |  |  | 0.315 | 0.5958 |
| γ_{E} P166 - CARA AMAN 9 |  | 0.0095 |  |  |
| γ_{E} P166 - CARC BGLCNA 1 | 0.1666 | 0.678 | 0.6364 | 0.4936 |
| γ_{E} T164 - CARA AMAN 10 |  | 0.2693 | 0.172 |  |
| γ_{E} Y77 - CARC AMAN 10 |  |  |  | 0.3311 |

Supplementary Table 2: edge correlation at the glycan - protein interface

| edge | replica_1 | replica_2 | replica_3 | replica_4 |
| --- | --- | --- | --- | --- |
| β_{A} N173 - β_{A} K237 | 0.7716 | 0.8087 |  |  |
| β_{A} D170 - β_{A} P168 | 0.7424 |  | 0.8085 |  |
| β_{A} D170 - β_{A} Y167 |  | 0.7859 |  | 0.7489 |
| β_{A} C174 - β_{A} Q172 |  |  | 0.7285 | 0.7346 |
| β_{A} C312 - β_{A} M285 |  |  |  | 0.489 |
| β_{A} Q172 - β_{A} D170 | 0.7308 | 0.6945 | 0.76 | 0.6955 |
| β_{A} E177 - β_{A} S233 |  |  | 0.7484 |  |
| β_{A} E177 - β_{A} T175 | 0.6784 | 0.7337 |  | 0.7229 |
| β_{A} E179 - β_{A} E177 | 0.7803 | 0.715 | 0.7514 | 0.7383 |
| β_{A} I305 - β_{A} L309 |  | 0.7952 | 0.8558 |  |
| β_{A} I305 - β_{A} Y308 |  |  |  | 0.8163 |
| β_{A} L309 - β_{A} M285 |  | 0.5301 | 0.4115 |  |
| β_{A} K237 - β_{A} Q172 | 0.7859 | 0.8178 |  |  |
| β_{A} M285 - β_{A} L283 | 0.8279 | 0.9059 | 0.8148 | 0.8031 |
| β_{A} P168 - β_{A} I305 |  |  | 0.717 |  |
| β_{A} P168 - β_{A} Y250 | 0.58 |  |  |  |
| β_{A} S233 - β_{A} S235 |  |  | 0.7001 |  |
| β_{A} S235 - β_{A} C174 |  |  | 0.7923 | 0.7723 |
| β_{A} S253 - β_{A} M285 | 0.4858 |  |  |  |
| β_{A} T175 - β_{A} N173 | 0.6518 | 0.7309 |  |  |
| β_{A} T175 - β_{A} S235 |  |  |  | 0.7397 |
| β_{A} Y167 - β_{A} I305 |  | 0.7423 |  | 0.6822 |
| β_{A} Y250 - β_{A} S253 | 0.748 |  |  |  |
| β_{A} Y308 - β_{A} C312 |  |  |  | 0.7775 |
| β_{C} A159 - β_{C} M79 | 0.7986 |  |  |  |
| β_{C} A304 - β_{C} Y308 |  | 0.7085 |  |  |
| β_{C} R165 - β_{C} A304 |  | 0.5966 |  |  |
| β_{C} R231 - β_{C} I178 |  |  |  | 0.7964 |
| β_{C} N124 - β_{C} A159 | 0.5754 |  |  |  |
| β_{C} D163 - β_{C} R165 |  | 0.7871 |  |  |
| β_{C} D170 - β_{C} P168 |  |  |  | 0.872 |
| β_{C} D170 - β_{C} Y167 |  |  | 0.7885 |  |
| β_{C} C174 - β_{C} Q172 |  | 0.738 | 0.717 | 0.7593 |
| β_{C} C312 - β_{C} M285 |  | 0.5265 |  |  |
| β_{C} Q172 - β_{C} D163 |  | 0.6559 |  |  |
| β_{C} Q172 - β_{C} D170 |  |  | 0.677 | 0.7576 |
| β_{C} E177 - β_{C} N124 | 0.6032 |  |  |  |
| β_{C} E177 - β_{C} T175 |  | 0.7241 | 0.7769 |  |
| β_{C} E179 - β_{C} R231 |  |  |  | 0.7606 |
| β_{C} E179 - β_{C} E177 | 0.7478 | 0.7518 | 0.761 |  |
| β_{C} E76 - β_{C} Y167 | 0.3299 |  |  |  |
| β_{C} I178 - β_{C} L176 |  |  |  | 0.7079 |
| β_{C} I305 - β_{C} L309 | 0.7638 |  | 0.7882 |  |
| β_{C} L176 - β_{C} C174 |  |  |  | 0.7688 |
| β_{C} L309 - β_{C} M285 | 0.3569 |  | 0.3871 |  |
| β_{C} M285 - β_{C} L283 | 0.8237 | 0.8009 | 0.821 | 0.8451 |
| β_{C} M79 - β_{C} E76 | 0.7501 |  |  |  |
| β_{C} P168 - β_{C} Y250 |  |  |  | 0.6185 |
| β_{C} S235 - β_{C} C174 |  | 0.7516 | 0.7682 |  |
| β_{C} S253 - β_{C} M285 |  |  |  | 0.3604 |
| β_{C} T175 - β_{C} S235 |  | 0.7398 | 0.7328 |  |
| β_{C} Y167 - β_{C} I305 | 0.7224 |  | 0.7853 |  |
| β_{C} Y250 - β_{C} S253 |  |  |  | 0.772 |
| β_{C} Y308 - β_{C} C312 |  | 0.7759 |  |  |

Supplementary Table 3: edge correlation for the shortest path in β subunit.

| edge | replica_1 | replica_2 | replica_3 | replica_4 |
| --- | --- | --- | --- | --- |
| α_{B} R94 - α_{B} T70 | 0.7422 | 0.6639 | 0.6969 | 0.7061 |
| α_{B} D176 - α_{B} F173 | 0.7631 |  | 0.7187 | 0.8279 |
| α_{B} D219 - α_{B} K249 |  | 0.7921 |  |  |
| α_{B} C180 - α_{B} H178 | 0.7355 |  | 0.6039 |  |
| α_{B} C261 - α_{B} M293 |  | 0.719 |  |  |
| α_{B} H178 - α_{B} D176 | 0.6058 |  | 0.6082 | 0.7735 |
| α_{B} H243 - α_{B} H245 |  | 0.8545 |  |  |
| α_{B} H245 - α_{B} D219 |  | 0.7934 |  |  |
| α_{B} I317 - α_{B} M293 | 0.4896 |  | 0.4286 | 0.5212 |
| α_{B} I72 - α_{B} V74 |  |  |  | 0.7518 |
| α_{B} L182 - α_{B} C180 | 0.7722 |  | 0.6876 |  |
| α_{B} K249 - α_{B} F253 |  | 0.7015 |  |  |
| α_{B} M240 - α_{B} L182 | 0.7184 |  |  |  |
| α_{B} M293 - α_{B} L291 | 0.8383 | 0.8773 | 0.7699 | 0.8551 |
| α_{B} M313 - α_{B} I317 | 0.7665 |  | 0.7652 | 0.8385 |
| α_{B} F173 - α_{B} M313 | 0.7434 |  | 0.6838 | 0.8244 |
| α_{B} F184 - α_{B} L182 |  |  | 0.6619 |  |
| α_{B} F244 - α_{B} H178 |  |  |  | 0.6596 |
| α_{B} F253 - α_{B} T257 |  | 0.8817 |  |  |
| α_{B} T241 - α_{B} H243 |  | 0.7395 |  |  |
| α_{B} T257 - α_{B} C261 |  | 0.874 |  |  |
| α_{B} T70 - α_{B} I72 |  |  |  | 0.7352 |
| α_{B} T70 - α_{B} M240 | 0.6663 |  |  |  |
| α_{B} T70 - α_{B} F184 |  |  | 0.4675 |  |
| α_{B} T70 - α_{B} W198 |  | 0.7814 |  |  |
| α_{B} W198 - α_{B} T241 |  | 0.6233 |  |  |
| α_{B} V74 - α_{B} F244 |  |  |  | 0.506 |
| α_{D} R248 - α_{D} P174 |  |  |  | 0.7765 |
| α_{D} R94 - α_{D} K69 |  | 0.769 |  |  |
| α_{D} R94 - α_{D} F73 |  |  | 0.6906 | 0.6085 |
| α_{D} R94 - α_{D} T70 | 0.755 |  |  |  |
| α_{D} D176 - α_{D} F173 | 0.8878 | 0.8632 |  |  |
| α_{D} D90 - α_{D} S76 |  |  |  | 0.8385 |
| α_{D} C166 - α_{D} M168 |  |  | 0.5428 |  |
| α_{D} C180 - α_{D} H178 |  | 0.7407 |  |  |
| α_{D} E197 - α_{D} M240 |  | 0.6964 |  |  |
| α_{D} G78 - α_{D} L215 |  |  |  | 0.7758 |
| α_{D} H178 - α_{D} D176 | 0.8475 | 0.8083 |  |  |
| α_{D} I317 - α_{D} M293 | 0.4545 | 0.646 |  | 0.5593 |
| α_{D} I317 - α_{D} Y321 |  |  | 0.7958 |  |
| α_{D} I89 - α_{D} Y87 |  |  | 0.7422 |  |
| α_{D} L170 - α_{D} F173 |  |  | 0.7658 |  |
| α_{D} L182 - α_{D} C180 |  | 0.6511 |  |  |
| α_{D} L215 - α_{D} Y218 |  |  |  | 0.8005 |
| α_{D} K69 - α_{D} E197 |  | 0.8572 |  |  |
| α_{D} M168 - α_{D} L170 |  |  | 0.6958 |  |
| α_{D} M240 - α_{D} L182 |  | 0.6669 |  |  |
| α_{D} M293 - α_{D} L291 | 0.8423 | 0.8368 |  | 0.8555 |
| α_{D} M313 - α_{D} I317 | 0.8486 | 0.8095 | 0.7962 | 0.7397 |
| α_{D} F173 - α_{D} M313 | 0.8175 | 0.7965 | 0.7411 |  |
| α_{D} F244 - α_{D} H178 | 0.7717 |  |  |  |
| α_{D} F73 - α_{D} D90 |  |  |  | 0.7135 |
| α_{D} F73 - α_{D} V91 |  |  | 0.7726 |  |
| α_{D} P174 - α_{D} M313 |  |  |  | 0.7226 |
| α_{D} S76 - α_{D} G78 |  |  |  | 0.798 |
| α_{D} T242 - α_{D} F244 | 0.8167 |  |  |  |
| α_{D} T294 - α_{D} L291 |  |  | 0.8214 |  |
| α_{D} T70 - α_{D} W198 | 0.7975 |  |  |  |
| α_{D} W198 - α_{D} V225 | 0.5434 |  |  |  |
| α_{D} Y218 - α_{D} R248 |  |  |  | 0.8691 |
| α_{D} Y321 - α_{D} T294 |  |  | 0.6576 |  |
| α_{D} Y87 - α_{D} C166 |  |  | 0.6039 |  |
| α_{D} V225 - α_{D} T242 | 0.8448 |  |  |  |
| α_{D} V91 - α_{D} I89 |  |  | 0.6718 |  |

Supplementary Table 4: edge correlation for the shortest path in α subunit.
